# Supplementary material for: Dynamics of proton transfer in imidazole hydrogen-bond chains
Source: Royal Society of Chemistry journal article supplement (doi:10.1039/c6ra17636d), 2016-01-01
Supplement: c6ra17636d1.pdf [file c6ra17636d1.pdf]

***Electronic supplementary information (ESI)***  
***for***  
***Dynamics of proton transfer in imidazole***  
***hydrogen-bond chains***

*Worapong Bua-ngern, Sermsiri Chaiwongwattana, Parichart Suwannakham,*  
*and Kritsana Sagarik\**

*School of Chemistry, Institute of Science, Suranaree University of Technology*  
*Nakhon Ratchasima 30000*  
*Thailand*

**Figure S1** Correlations of the static results of  $H^+(Im)_2$  obtained from the RIMP2/TZVP and B3LYP/TZVP calculations in the gas phase ( $\epsilon = 1$ ) and continuum solvent ( $\epsilon = 23$ ).

a) Interaction ( $\Delta E$ ) and solvation ( $\Delta E^{sol}$ ) energies.

b)  $R_{N-N}$  distance.

c) Asymmetric stretching coordinate ( $\Delta d_{DA}$ ).

d) Asymmetric N-H stretching frequency ( $\nu^{NH}$ ).

e) Isotropic shielding constant ( $\sigma_{H^+}$ ).

**Figure S2** Potential energy curves obtained from B3LYP/TZVP calculations in the gas phase.

a) Proton displacement in H-bond **(1)** of  $H^+(Im)_2$ .

b) Rotation ( $\omega_1$ ) of H-bond **(1)** in  $H^+(Im)_2$ .

c) Axial rotation ( $\theta$ ) of  $V_2$  reference vector in  $H^+(Im)_3$ .

d) Proton displacement in H-bond **(2)** of  $H^+(Im)_4$ .

e) Rotation ( $\omega_2$ ) of H-bond **(2)** in  $H^+(Im)_4$ .

$E^{rel}$  = relative energy.

**Figure S3** a) – c) Proton transfer profiles and time evolutions of dihedral angle ( $\omega_2$ ) of H-bond **(2)** in structure  $G4-[1]^{(\omega_1=-92)}$  obtained from BOMD simulations at 350 K. **L** and **S** = large- and small-amplitude N-N vibrations, respectively.

**Figure S4** a) Vibrational spectra of H-bond **(2)** in structure  $G4-[1]^{(\omega_1=-92)}$  obtained from BOMD simulations at 350 K.

b) Vibrational spectra for torsional oscillation ( $\omega_2$ ) of H-bond **(2)** in structure  $G4-[1]^{(\omega_1=-92)}$  obtained from BOMD simulations at 350 K.

c) Arrhenius plot for proton transfer in H-bond **(2)** of structure  $G4-[1]^{(\omega_1=-92)}$  obtained from BOMD simulations over the temperature range of 298 to 500 K.

**A** and **B** = oscillatory shuttling and structural diffusion peaks, respectively; **C** = characteristic peak of the N-H stretching mode in the imidazolium cation ( $H^+(Im)$ ); **P** = primary vibrational peak;  $\Delta E^{\ddagger, Arr}$  = activation energy obtained from the slope of the linear relationship between  $\ln(k)$  and  $1000/T$ .

- Figure S5** a) – c) VACF plots of N-N vibration in structure **G4-[1]**( $\omega_1=92$ ) obtained from BOMD simulations at 350, 400 and 450 K, respectively.
- Figure S6** Proton transfer profiles and time evolutions of dihedral angles ( $\omega_1$ ,  $\omega_2$  and  $\omega_3$ ) of H-bonds in structure **G4-[1]**( $\omega_1=92$ ) obtained from BOMD simulations at 350 K.
- Figure S7** Proton transfer profiles and time evolutions of dihedral angles ( $\omega_1$ ,  $\omega_2$  and  $\omega_3$ ) of H-bonds in structure **G4-[1]**( $\omega_1=92$ ) obtained from BOMD simulations at 298 K.
- Figure S8** a) – c) Proton transfer profiles and time evolutions of dihedral angle ( $\omega_2$ ) of H-bond (**2**) in structure **G4-[1]**( $\omega_1=92$ ) obtained from BOMD simulations at 298 K. **L** and **S** = large- and small-amplitude N-N vibrations, respectively.
- Table S1** Static results of  $H^+(Im)_n$ ,  $n = 2 - 4$ , obtained from B3LYP/TZVP calculations. Energies, distances, vibrational frequencies,  $^1H$  NMR isotropic shielding constants and chemical shifts are in kJ/mol, Å,  $cm^{-1}$ , and ppm, respectively.
- Table S2** Static results of  $H^+(Im)_n$ ,  $n = 2 - 4$ , obtained from RIMP2/TZVP calculations. Energies, distances, vibrational frequencies,  $^1H$  NMR isotropic shielding constants and chemical shifts are in kJ/mol, Å,  $cm^{-1}$ , and ppm, respectively.
- Table S3**  $^1H$  NMR chemical shifts ( $\delta_{H^+}^{MD}$ ) and line widths ( $\Delta\delta_{H^+}^{MD}$ ) of proton in H-bond (**1**) of structure **G2-[1]**( $\omega_1 = 94$ ) obtained from BOMD simulations over the temperature range of 298 – 500 K.  $\delta_{H^+}^{MD}$ ,  $\Delta\delta_{H^+}^{MD}$  and temperature are in ppm and K, respectively.



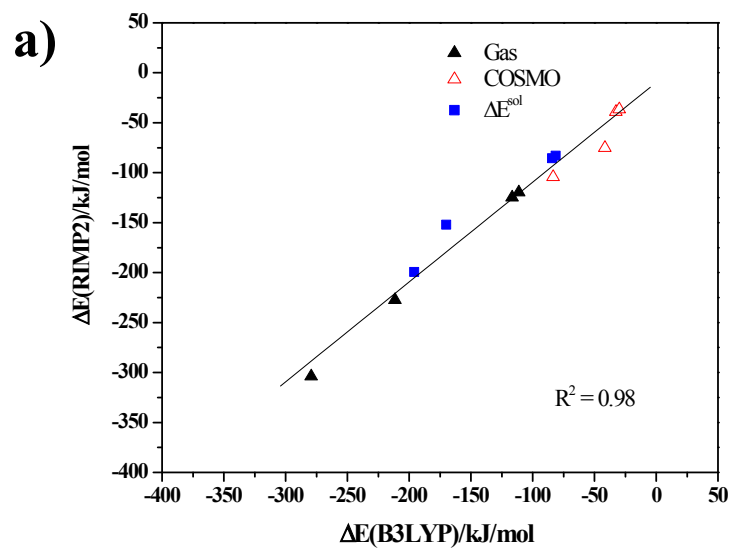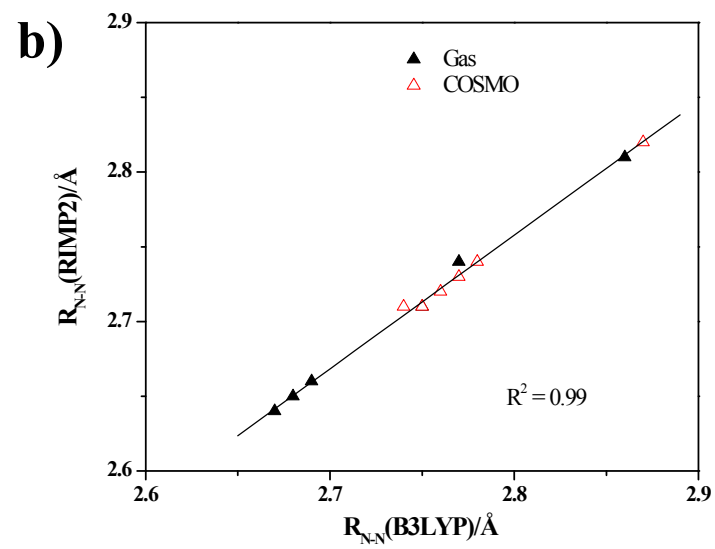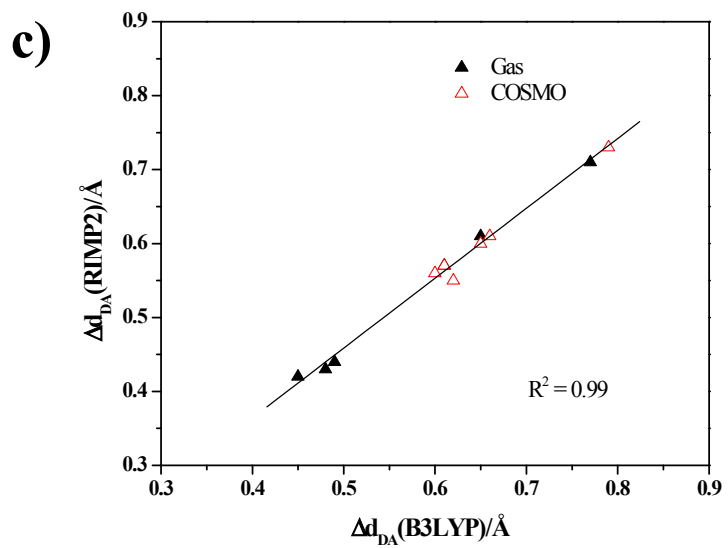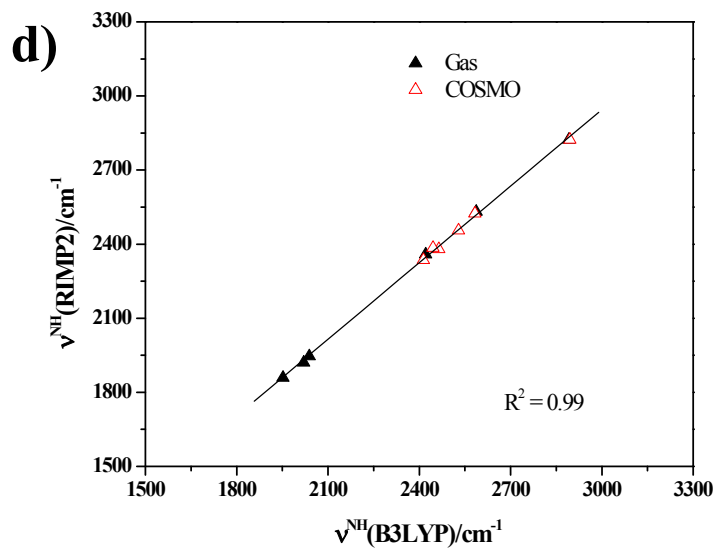

**Figure S1**

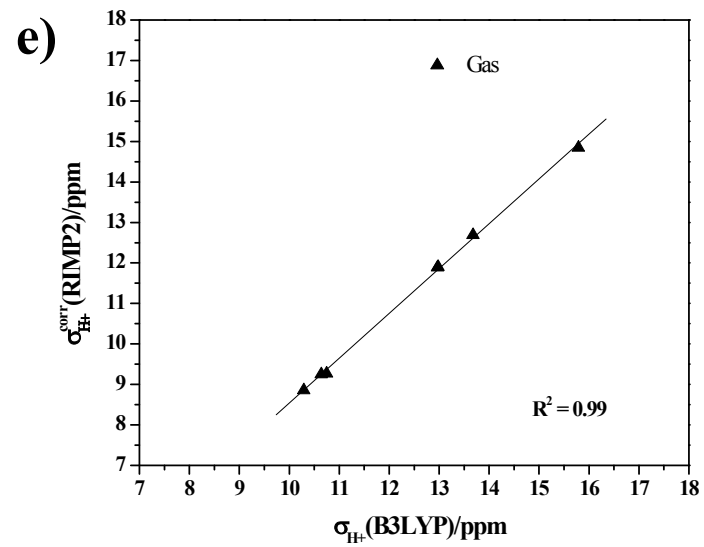

Figure S1 (cont.)

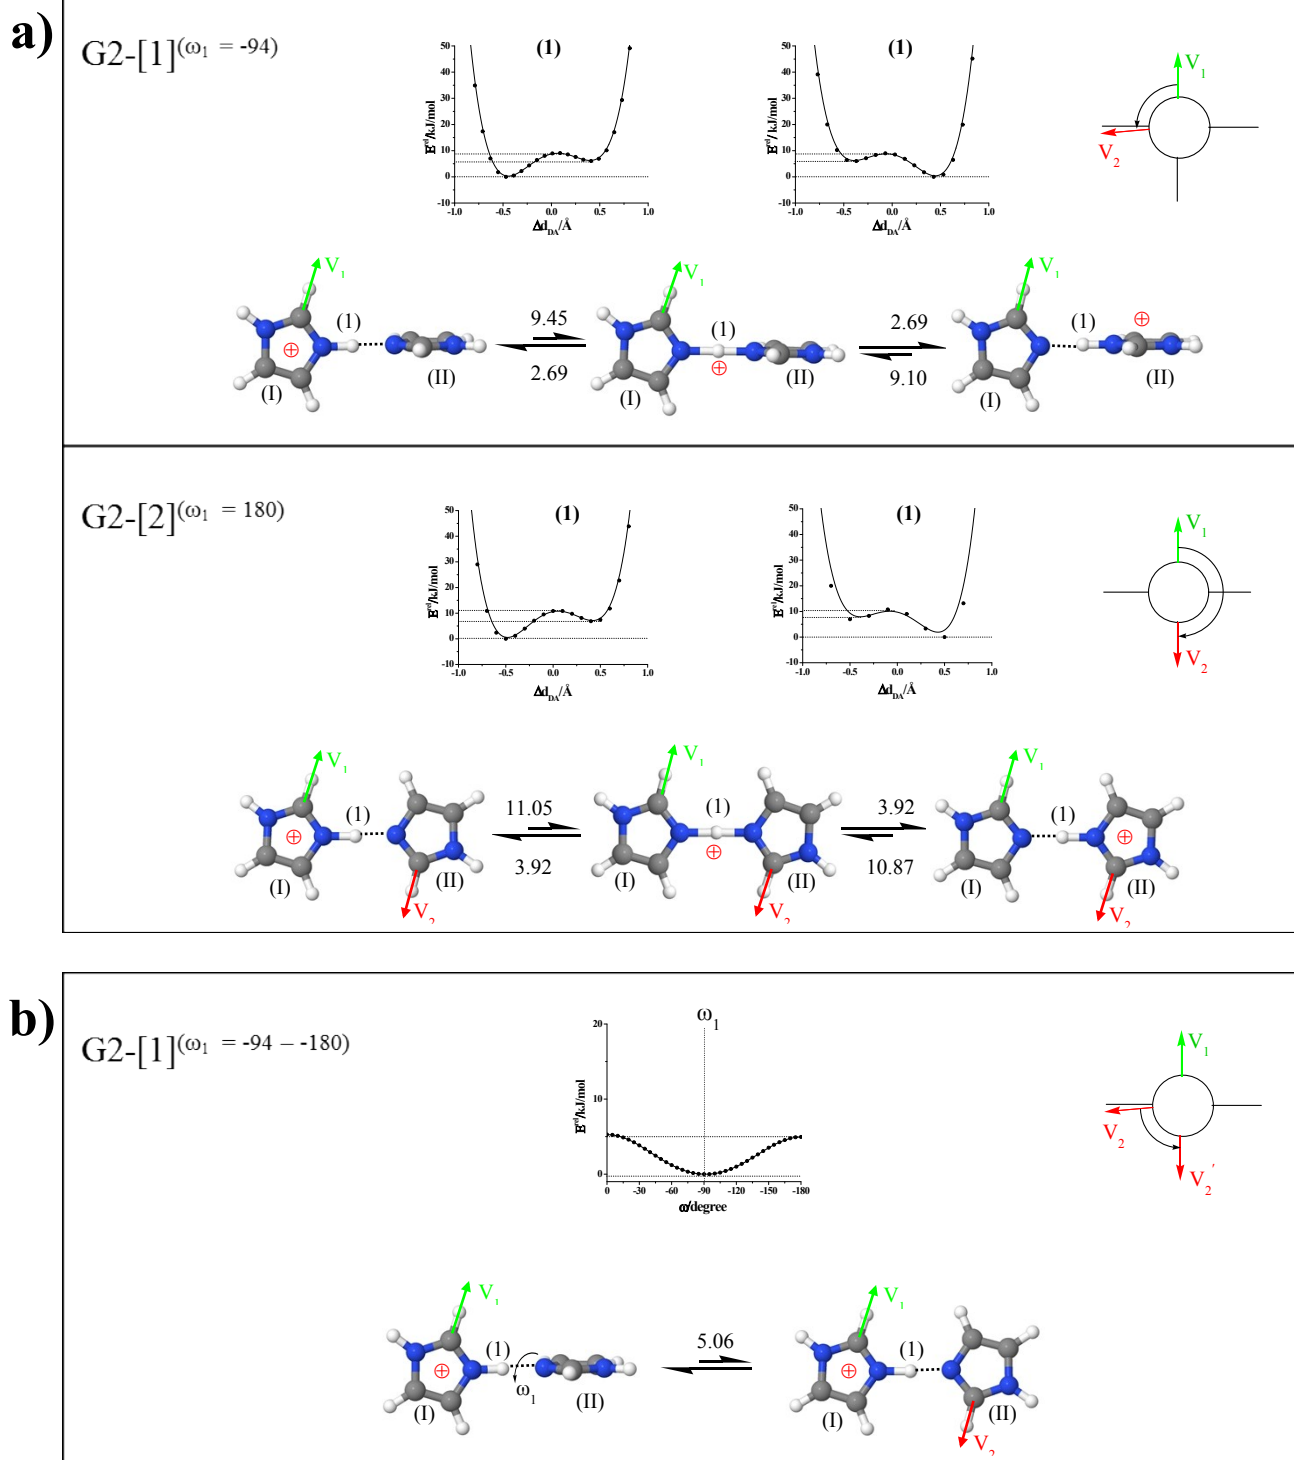

**Figure S2**

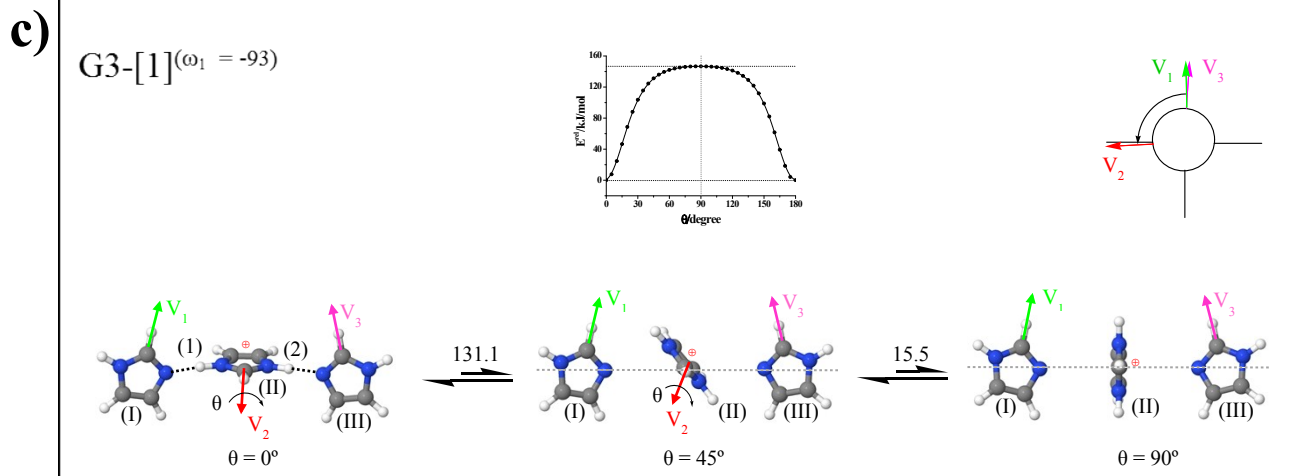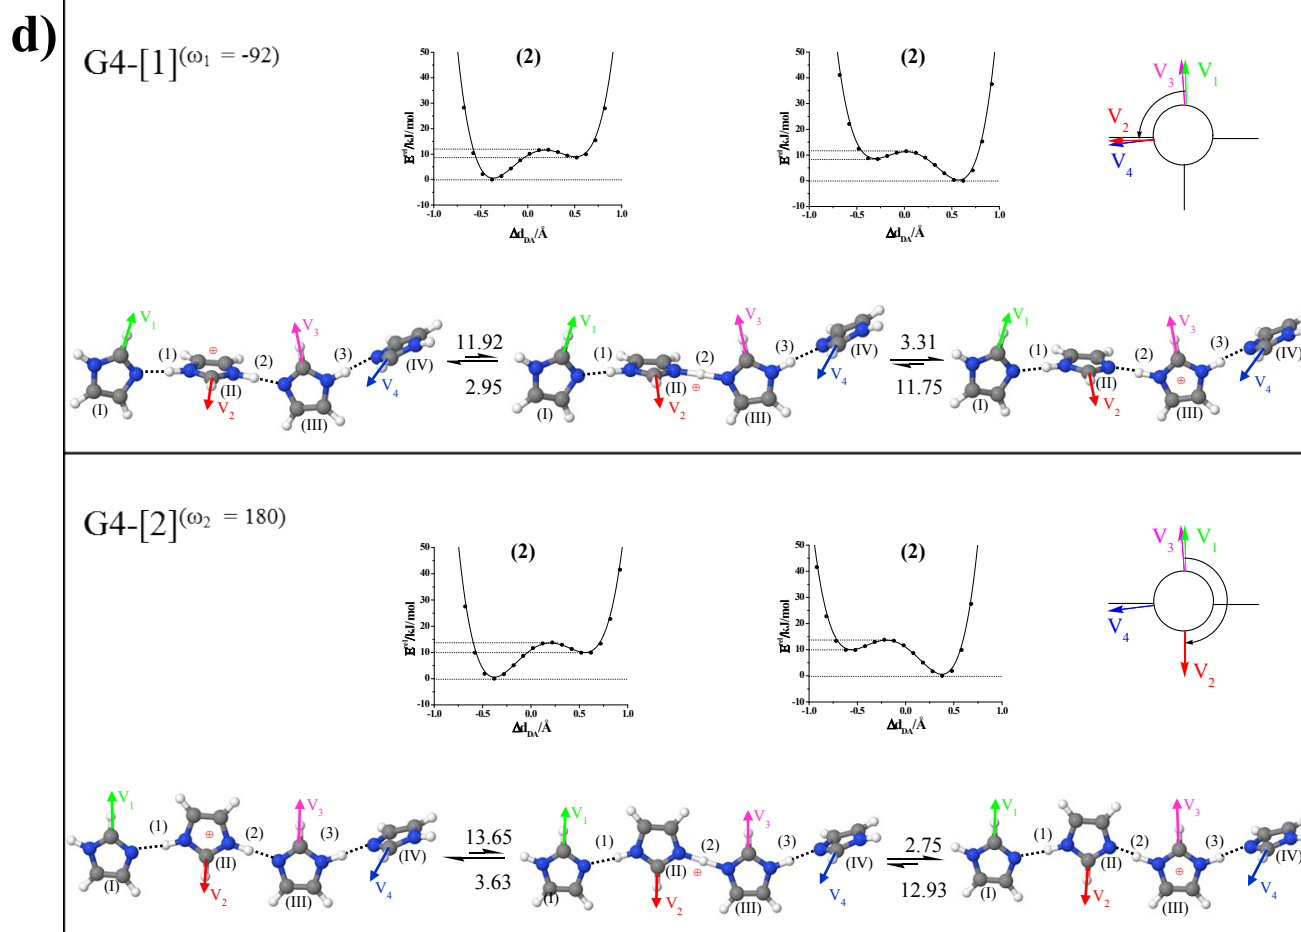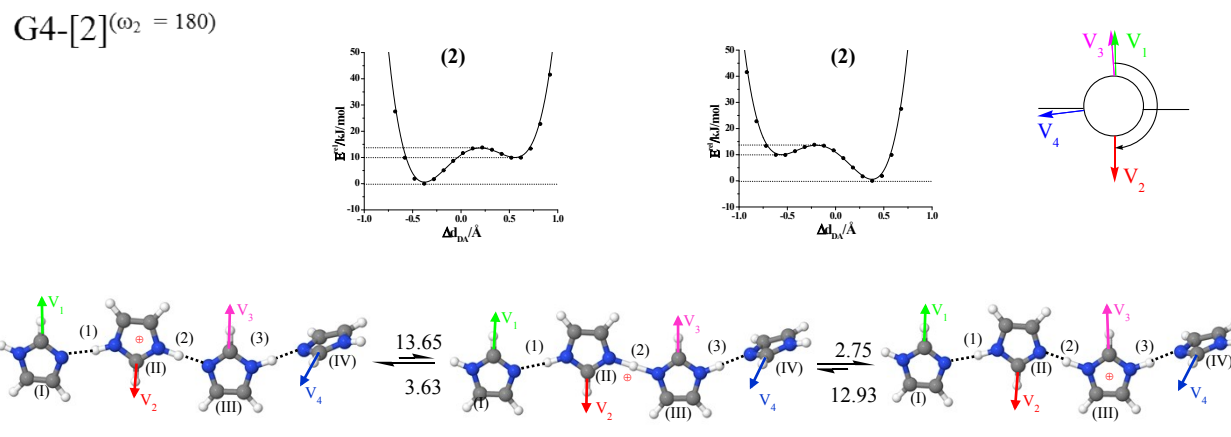

**Figure S2 (cont.)**



e)

$$G4-[1]^{(\omega_2 = -94 - 180)}$$

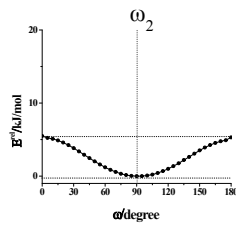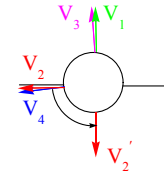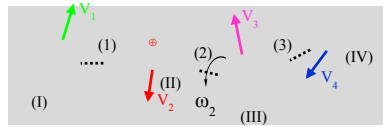

5.33

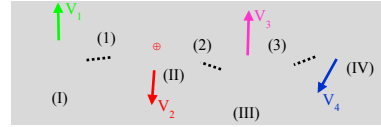

Figure S2 (cont.)

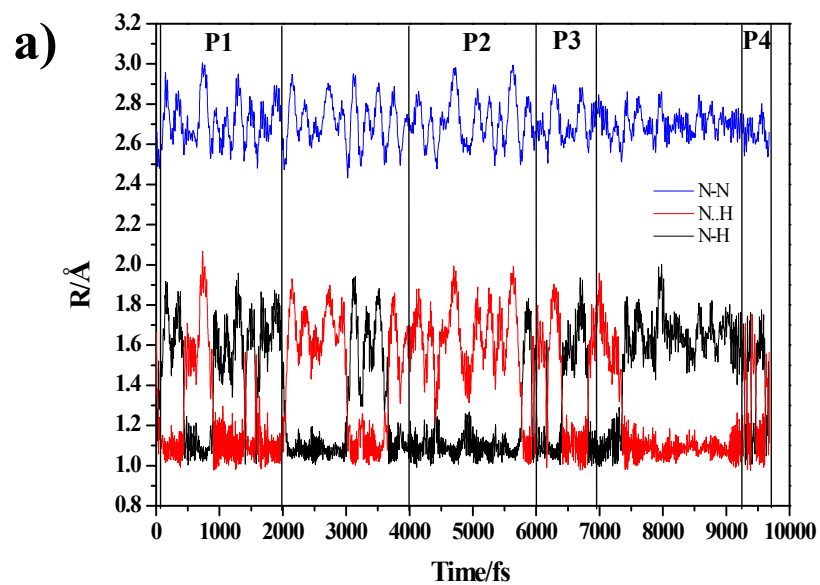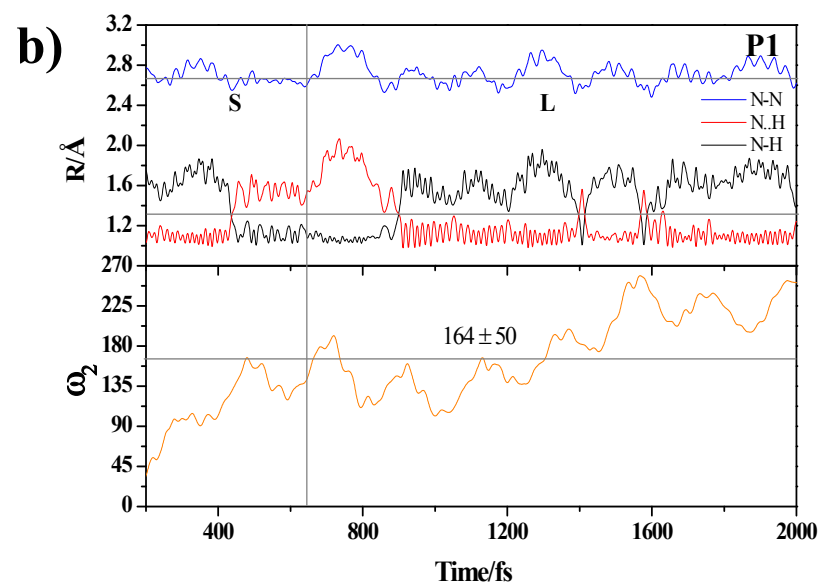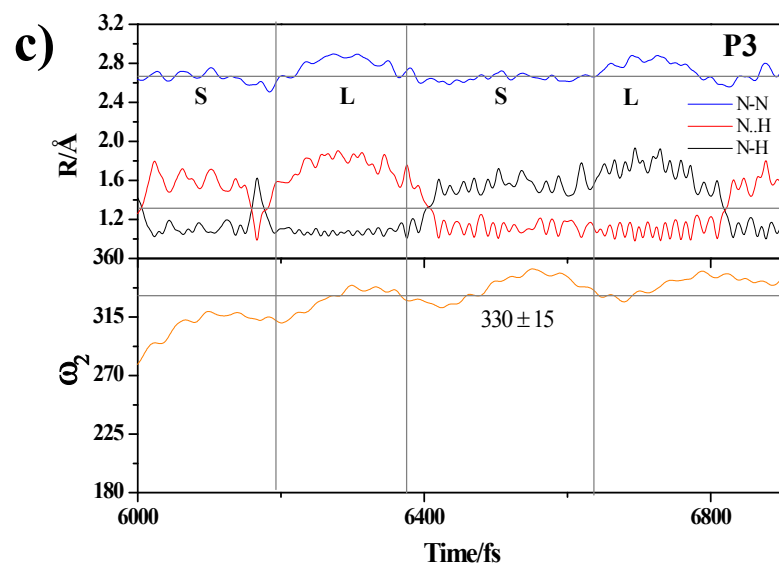

**Figure S3**

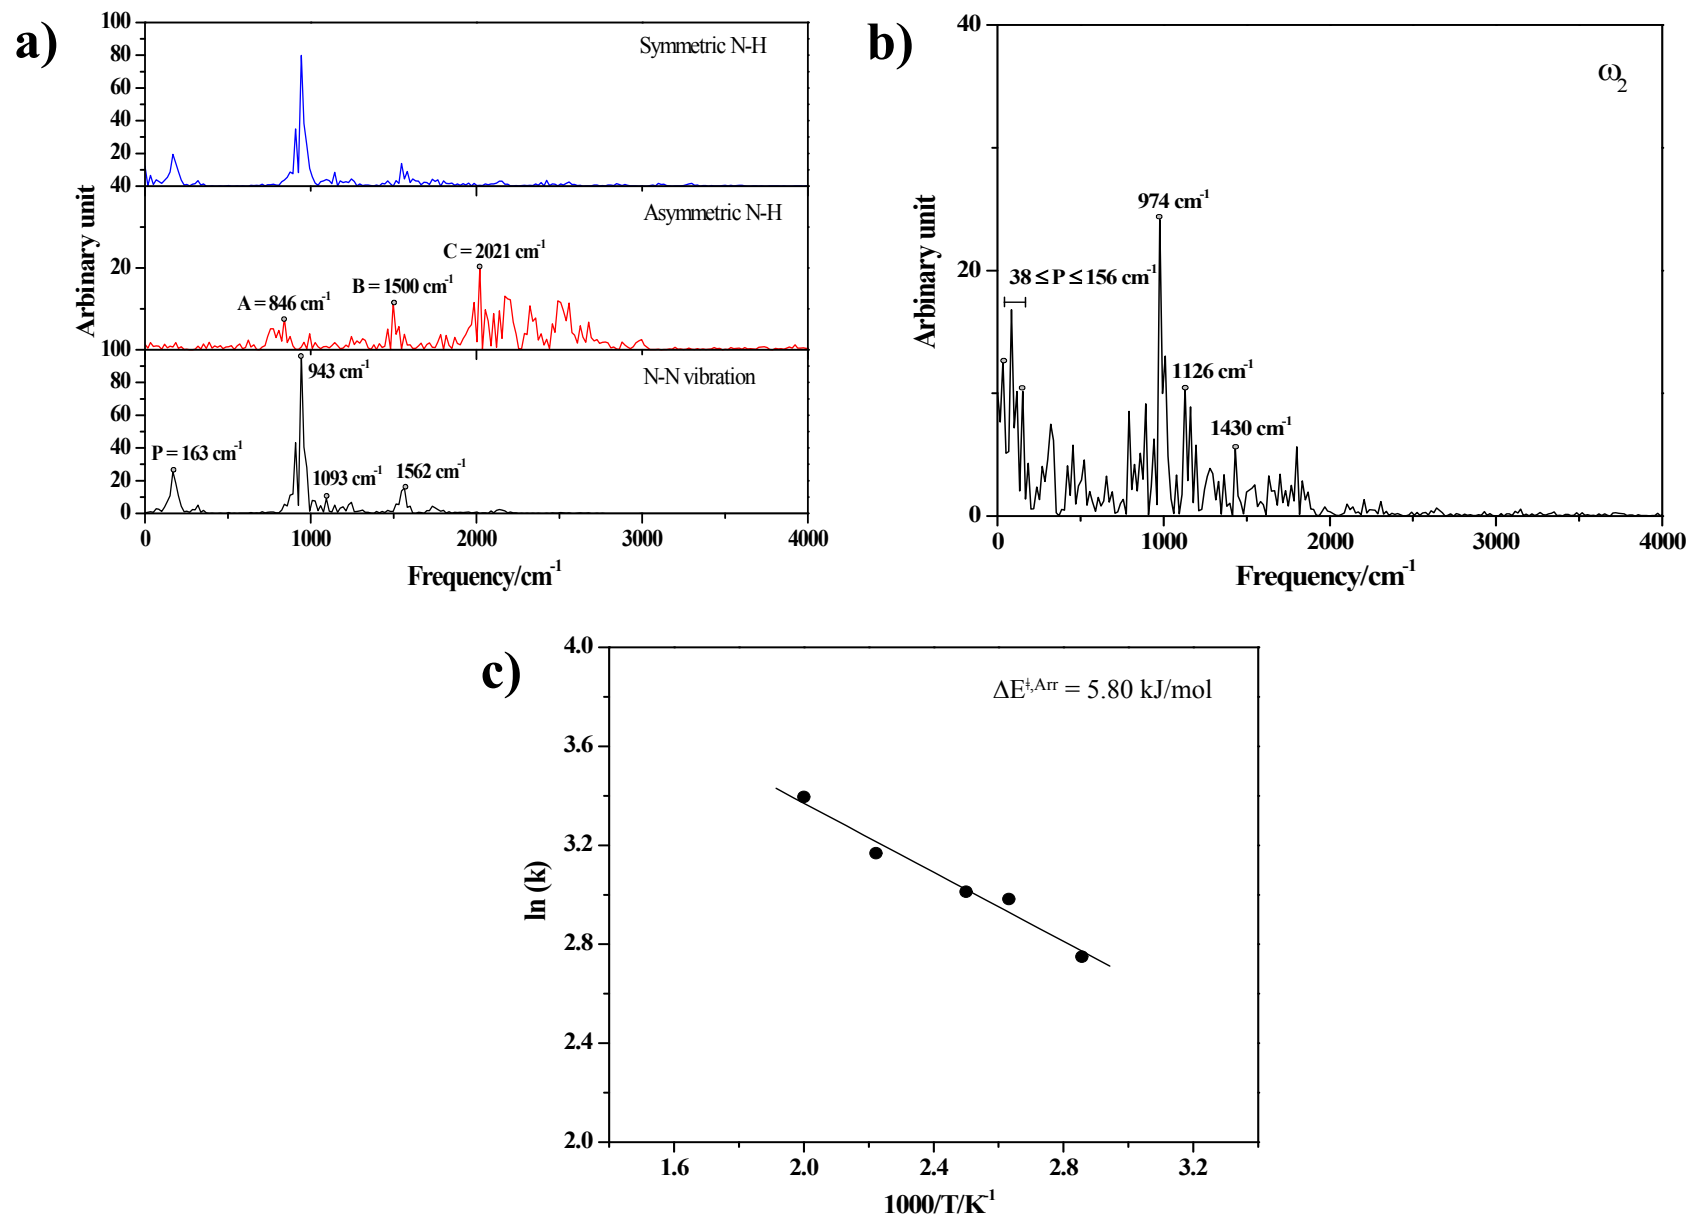

Figure S4

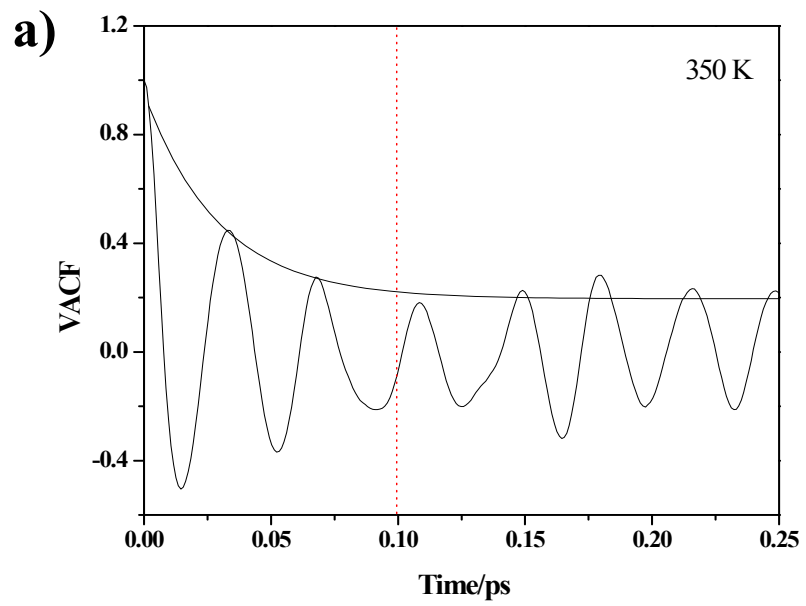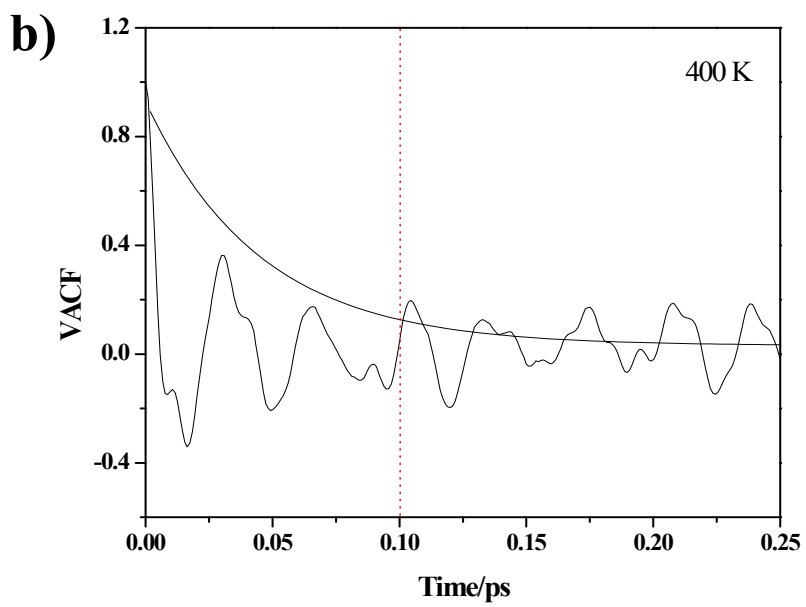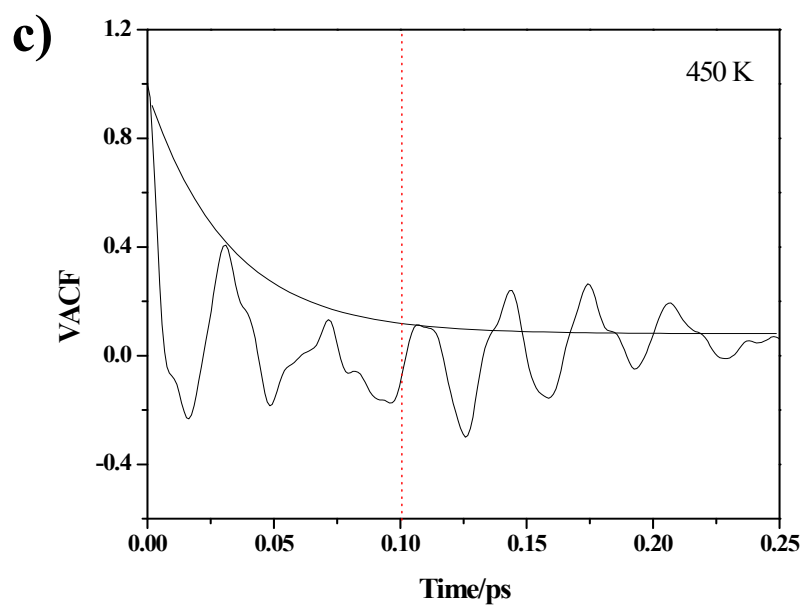

**Figure S5**

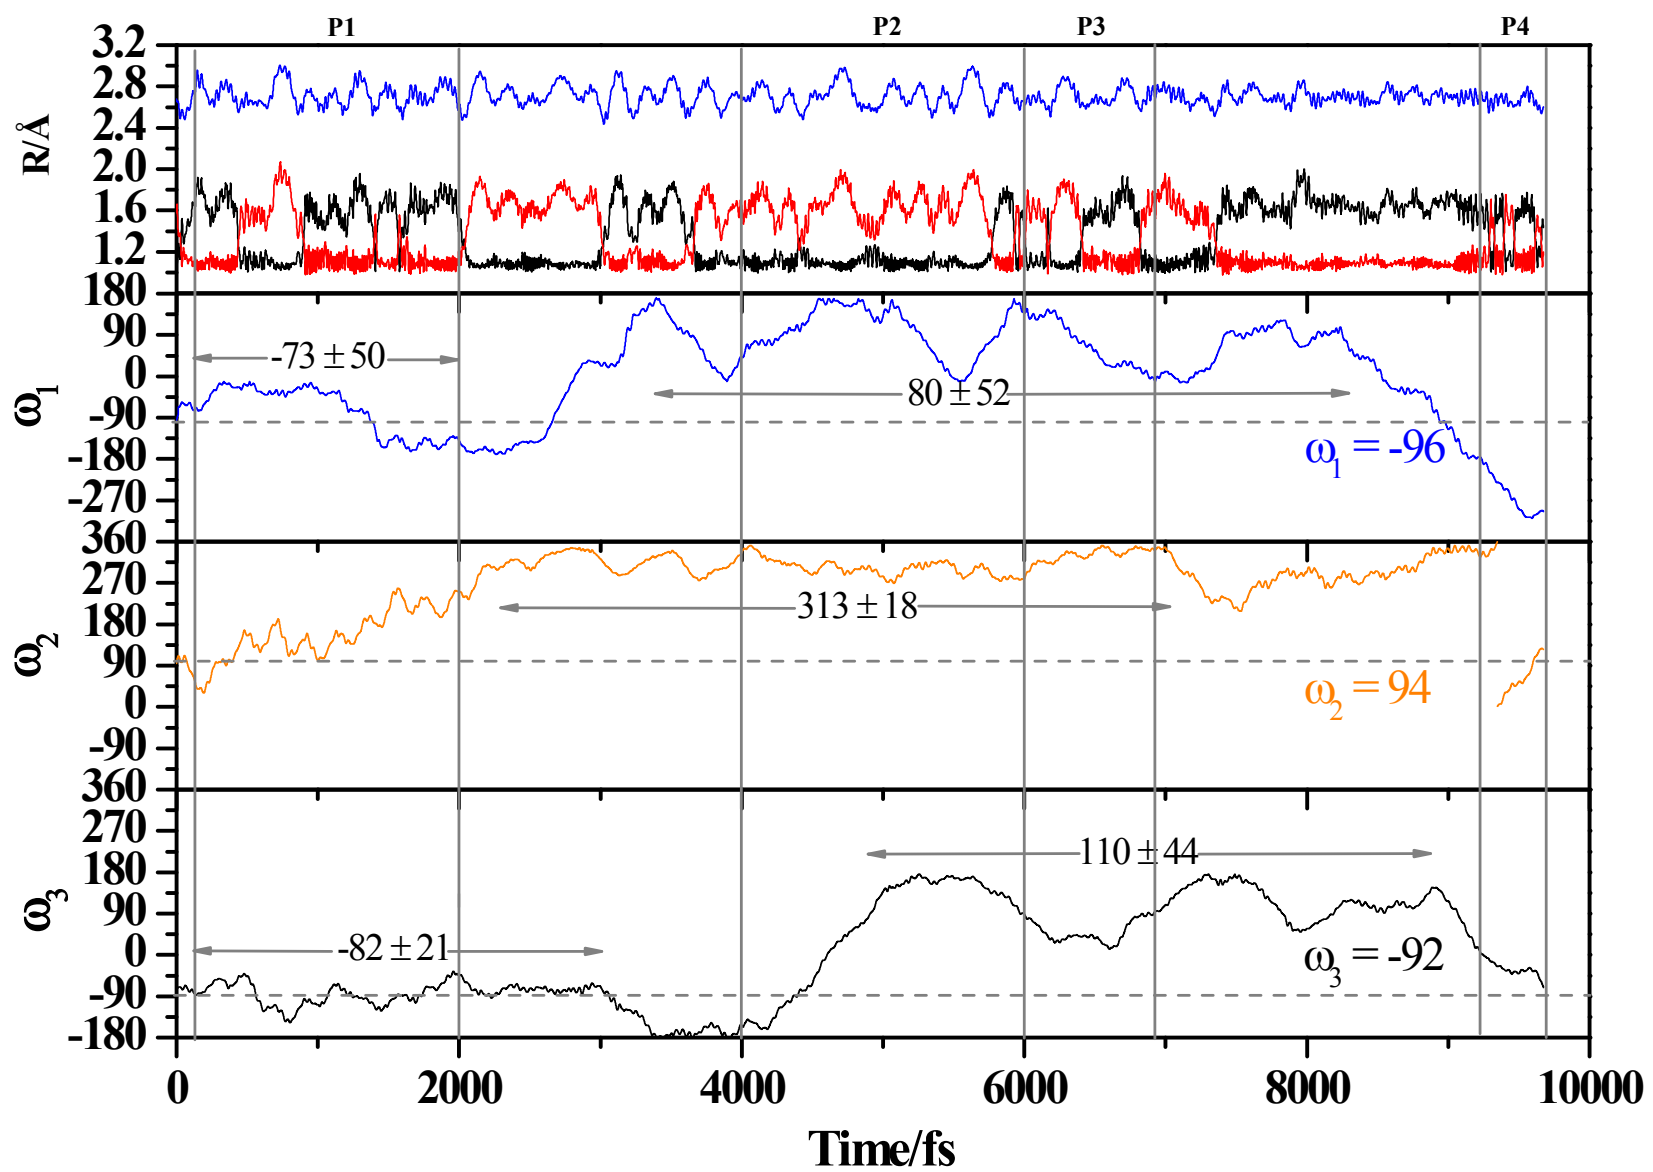

Figure S6

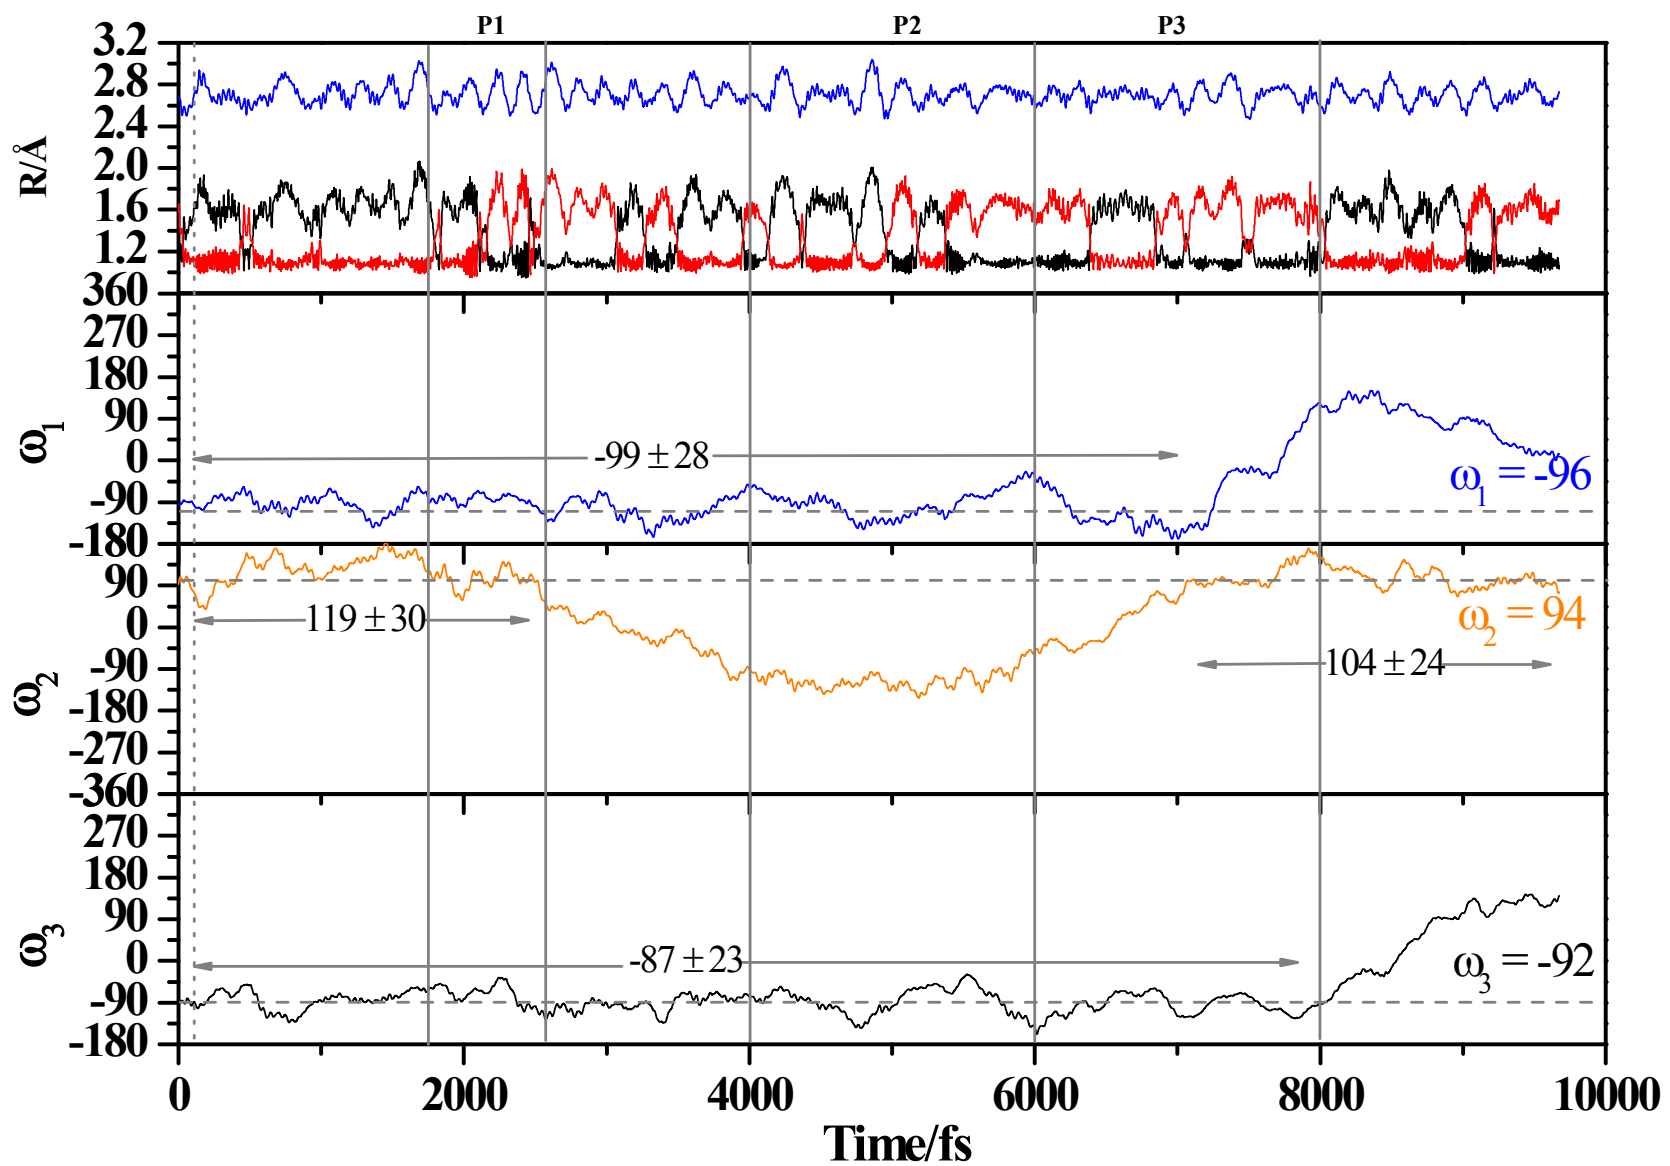

Figure S7

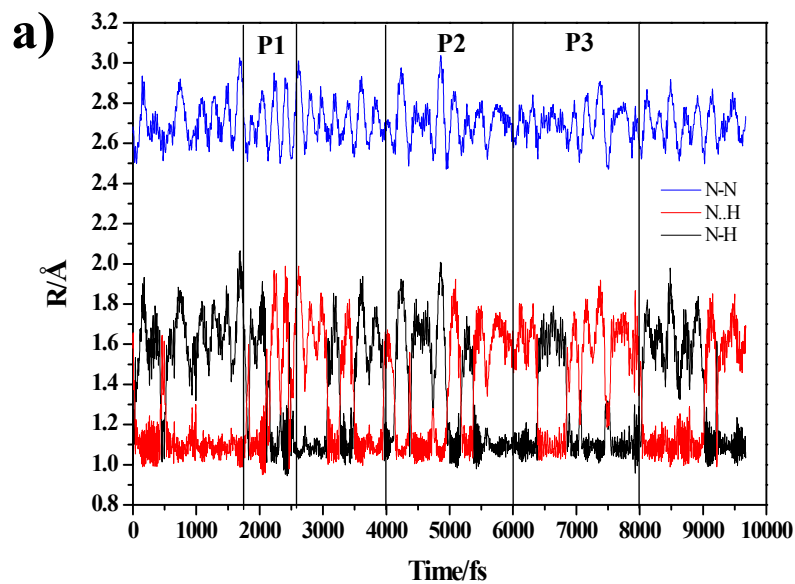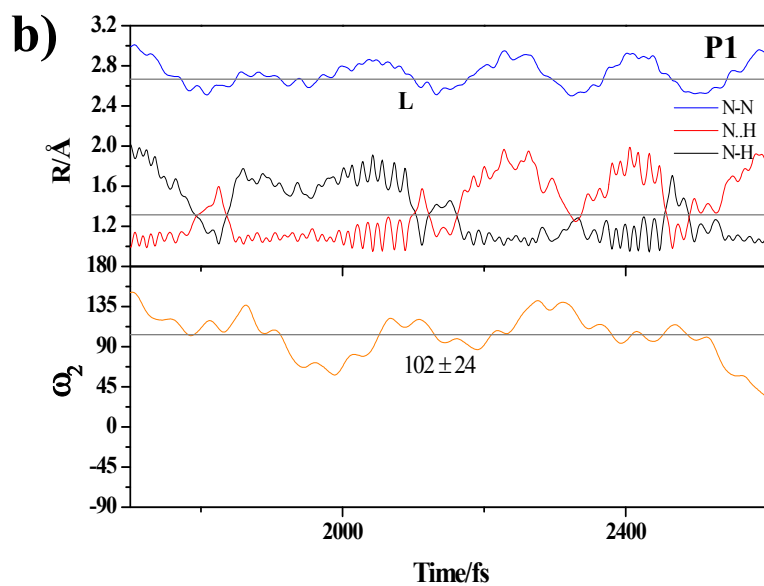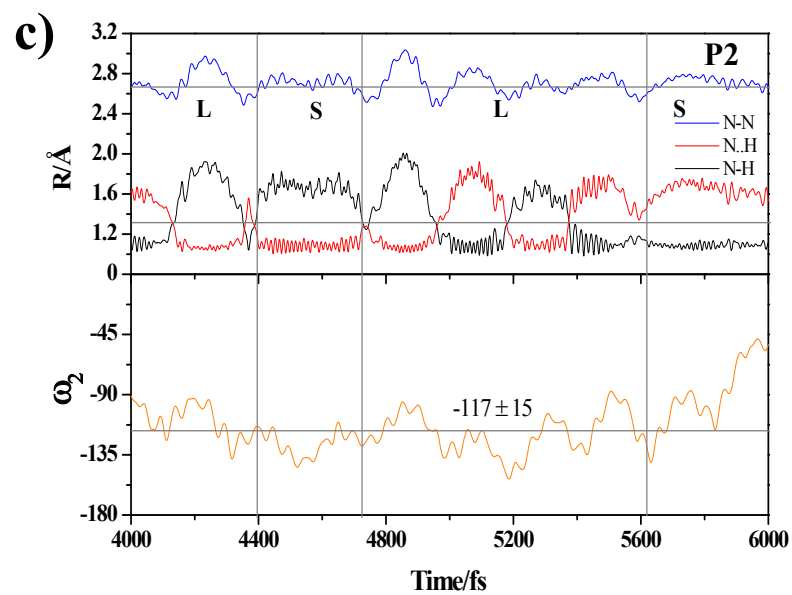

**Figure S8**

**Table S1** Static results of  $H^+(Im)_n$ ,  $n = 2 - 4$ , obtained from B3LYP/TZVP calculations. Energies, distances, vibrational frequencies,  $^1H$  NMR isotropic shielding constants and chemical shifts are in kJ/mol, Å,  $cm^{-1}$ , and ppm, respectively.

| Gas                                                                                                              | COSMO                                                                                                            | H-bond            | $R_{N-N}$                                          | $\Delta d_{DA}$                                    | $\nu^{NH}$                                         | $\sigma_{H^+}$                         | $\delta_{H^+}$                         | $\Delta E$                            | $\Delta E^{sol}$                |
|------------------------------------------------------------------------------------------------------------------|------------------------------------------------------------------------------------------------------------------|-------------------|----------------------------------------------------|----------------------------------------------------|----------------------------------------------------|----------------------------------------|----------------------------------------|---------------------------------------|---------------------------------|
| G2-[1]( $\omega_1 = -94$ )<br>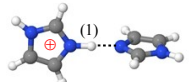  | C2-[1]( $\omega_1 = -94$ )<br>  | (1)               | 2.67<br>(2.74)                                     | 0.45<br>(0.60)                                     | 1952<br>(2414)                                     | 10.29<br>-                             | 21.68<br>-                             | -116.7<br>(-32.6)                     | -84.2<br>-                      |
| G2-[2]( $\omega_1 = 180$ )<br>  | C2-[2]( $\omega_1 = -175$ )<br> | (1)               | 2.69<br>(2.76)                                     | 0.49<br>(0.63)                                     | 2020<br>(2464)                                     | 10.75<br>-                             | 21.22<br>-                             | -111.1<br>(-29.8)                     | -81.3<br>-                      |
| G3-[1]( $\omega_1 = -93$ )<br>  | C3-[1]( $\omega_1 = -61$ )<br>  | (1)<br>(2)        | 2.75<br>(2.78)<br>2.75<br>(2.77)                   | 0.61<br>(0.66)<br>0.61<br>(0.65)                   | 2421<br>(2529)<br>2421<br>(2529)                   | 12.97<br>-<br>12.98<br>-               | 19.00<br>-<br>18.99<br>-               | -211.4<br>(-41.5)<br>-<br>-           | -169.9<br>-<br>-<br>-           |
| G4-[1]( $\omega_1 = 93$ )<br> | C4-[1]( $\omega_1 = 92$ )<br> | (1)<br>(2)<br>(3) | 2.68<br>(2.75)<br>2.77<br>(2.78)<br>2.86<br>(2.87) | 0.48<br>(0.61)<br>0.65<br>(0.66)<br>0.77<br>(0.79) | 2039<br>(2445)<br>2587<br>(2583)<br>2892<br>(2895) | 10.64<br>-<br>13.68<br>-<br>15.79<br>- | 21.33<br>-<br>18.29<br>-<br>16.18<br>- | -279.3<br>(-83.4)<br>-<br>-<br>-<br>- | -195.9<br>-<br>-<br>-<br>-<br>- |

$R_{N-N}$  = H-bond distance;  $\Delta d_{DA}$  = asymmetric stretching coordinate;  $\Delta E$  = interaction energy;  $\Delta E^{sol}$  = solvation energy;  $\nu^{NH}$  = asymmetric N-H stretching frequency;  $\sigma_{H^+}$  =  $^1H$  NMR isotropic shielding constants;  $\delta_{H^+}$  =  $^1H$  NMR chemical shift; (..) = continuum liquid (COSMO,  $\epsilon = 23$ ).



**Table S2** Static results of  $H^+(Im)_n$ ,  $n = 2 - 4$ , obtained from RIMP2/TZVP calculations. Energies, distances, vibrational frequencies,  $^1H$  NMR isotropic shielding constants and chemical shifts are in kJ/mol, Å,  $cm^{-1}$ , and ppm, respectively.

| Gas                                                                                                               | COSMO                                                                                                             | H-bond            | $R_{N-N}$                                          | $\Delta d_{DA}$                                    | $\nu^{NH}$                                         | $\sigma_{H^+}^{corr}$                 | $\delta_{H^+}^{corr}$                  | $\Delta E$                             | $\Delta E^{sol}$                |
|-------------------------------------------------------------------------------------------------------------------|-------------------------------------------------------------------------------------------------------------------|-------------------|----------------------------------------------------|----------------------------------------------------|----------------------------------------------------|---------------------------------------|----------------------------------------|----------------------------------------|---------------------------------|
| G2-[1]( $\omega_1 = -98$ )<br>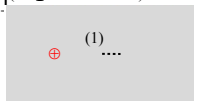   | C2-[1]( $\omega_1 = -83$ )<br>   | (1)               | 2.64<br>(2.71)                                     | 0.42<br>(0.56)                                     | 1859<br>(2336)                                     | 8.86<br>-                             | 23.10<br>-                             | -124.8<br>(-39.1)                      | -85.6<br>-                      |
| G2-[2]( $\omega_1 = 180$ )<br>   | C2-[2]( $\omega_1 = 180$ )<br>   | (1)               | 2.66<br>(2.72)                                     | 0.44<br>(0.58)                                     | 1921<br>(2380)                                     | 9.27<br>-                             | 22.69<br>-                             | -119.6<br>(-36.5)                      | -83.1<br>-                      |
| G3-[1]( $\omega_1 = -99$ )<br>   | C3-[1]( $\omega_1 = -84$ )<br>   | (1)<br>(2)        | 2.71<br>(2.74)<br>2.71<br>(2.73)                   | 0.57<br>(0.61)<br>0.57<br>(0.60)                   | 2359<br>(2456)<br>2359<br>(2456)                   | 11.89<br>-<br>11.90<br>-              | 20.07<br>-<br>20.06<br>-               | -227.3<br>(-75.2)<br>-<br>-            | -152.0<br>-<br>-<br>-           |
| G4-[3]( $\omega_1 = 167$ )<br> | C4-[3]( $\omega_1 = 146$ )<br> | (1)<br>(2)<br>(3) | 2.65<br>(2.71)<br>2.74<br>(2.74)<br>2.81<br>(2.82) | 0.43<br>(0.57)<br>0.61<br>(0.61)<br>0.71<br>(0.73) | 1946<br>(2385)<br>2532<br>(2524)<br>2823<br>(2823) | 9.25<br>-<br>12.69<br>-<br>14.85<br>- | 22.72<br>-<br>19.27<br>-<br>17.12<br>- | -303.8<br>(-104.3)<br>-<br>-<br>-<br>- | -199.4<br>-<br>-<br>-<br>-<br>- |

$R_{N-N}$  = H-bond distance;  $\Delta d_{DA}$  = asymmetric stretching coordinate;  $\Delta E$  = interaction energy;  $\Delta E^{sol}$  = solvation energy;  $\nu^{NH}$  = asymmetric N-H stretching frequency;  $\sigma_{H^+}^{corr}$  = isotropic shielding constants;  $\delta_{H^+}^{corr}$  =  $^1H$  NMR chemical shift; (..) = continuum liquid (COSMO,  $\epsilon = 23$ ).

**Table S3**  $^1\text{H}$  NMR chemical shifts ( $\delta_{\text{H}^+}^{\text{MD}}$ ) and line widths ( $\Delta\delta_{\text{H}^+}^{\text{MD}}$ ) of proton in H-bond (**1**) of structure **G2-[1]** ( $\omega_1 = -94$ ) obtained from BOMD simulations over the temperature range of 298 – 500 K.  $\delta_{\text{H}^+}^{\text{MD}}$ ,  $\Delta\delta_{\text{H}^+}^{\text{MD}}$  and temperature are in ppm and K, respectively.

| T   | Peak     | $\delta_{\text{H}^+}^{\text{MD}}$ | $\Delta\delta_{\text{H}^+}^{\text{MD}}$ |
|-----|----------|-----------------------------------|-----------------------------------------|
| 298 | <b>A</b> | 24.39                             | 1.45                                    |
|     | <b>B</b> | 20.96                             | 3.76                                    |
|     | <b>C</b> | 17.63                             | 2.47                                    |
| 350 | <b>A</b> | 24.68                             | 0.90                                    |
|     | <b>B</b> | 22.25                             | 2.83                                    |
|     | <b>C</b> | 19.54                             | 3.00                                    |
| 380 | <b>A</b> | 24.50                             | 0.77                                    |
|     | <b>B</b> | 21.16                             | 3.47                                    |
|     | <b>C</b> | 17.77                             | 3.28                                    |
| 400 | <b>A</b> | 24.03                             | 2.18                                    |
|     | <b>B</b> | 20.66                             | 2.98                                    |
|     | <b>C</b> | 17.69                             | 3.57                                    |
| 450 | <b>A</b> | 24.39                             | 1.19                                    |
|     | <b>B</b> | 22.45                             | 1.95                                    |
|     | <b>C</b> | 19.96                             | 2.87                                    |
| 500 | <b>A</b> | 24.64                             | 1.04                                    |
|     | <b>B</b> | 21.57                             | 3.30                                    |
|     | <b>C</b> | 18.41                             | 2.66                                    |

A = oscillatory shuttling peak; B = structural diffusion peak;  
 C = characteristic peak of proton in imidazolium cation ( $\text{H}^+(\text{Im})$ ).
